# Supplementary material
Source: PubMed Central journal article supplement (PMC3155309)
Supplement: emboj2011178s1.pdf [file emboj2011178s1.pdf]

## Supplementary Figure Legends

**Fig. S1  $\beta$ -arr enhances PTEN lipid phosphatase activity.** **a.** Schematic representation of the bait chimera used to screen a human thymus cDNA library. An adaptor coding for five glycine residues was inserted between the cDNAs for hSos and  $\beta$ -arr2 $\Delta$ C1 encoding amino acids 1-337 of  $\beta$ -arr2, to reduce structural interference. **b.** Myc immunoprecipitates from HEK cells expressing vector control, Myc-PTEN, Myc-PTEN and FLAG- $\beta$ -arr1 or Myc-PTEN and FLAG- $\beta$ -arr2 were analyzed for the capacity to dephosphorylate water-soluble diC8-PIP3 (100 $\mu$ M).

**Fig. S2 Active RhoAV14 increases  $\beta$ -arr-PTEN association.** **a.** Co-immunoprecipitation analysis of FLAG- $\beta$ -arr1 with PTEN in the presence or absence of active RhoA-V14 from lysates of cotransfected COS cells. Experiment was conducted as in Fig. 4a. **b.** Western blot showing siRNA-mediated reduction in  $\beta$ -arr levels using either a pan- $\beta$ -arr1/2 rabbit polyclonal antibody (A1CT) or a  $\beta$ -arr2 specific rabbit monoclonal antibody (Cell Signalling).

**Fig. S3  $\beta$ -arr1 and  $\beta$ -arr2 cooperate with PTEN to inhibit Akt activation.** **a.** PTEN-null prostate cancer PC-3 cells were transfected with control vector, PTEN alone or PTEN in combination with  $\beta$ -arr1 or  $\beta$ -arr2, and pAkt levels were monitored by Western blot (lanes 1-4). Both  $\beta$ -arr1 and  $\beta$ -arr2 enhanced PTEN-mediated inhibition of Akt activation. When expressed alone (lanes 8-9) or with PTEN-G129E (lanes 6-7),  $\beta$ -arrs had no effect on pAkt levels versus relative control transfected cells. **b.** Active Akt levels (pThr308 and pSer473) in wild-type and  $\beta$ -arr1/2 DKO MEFs before and after stimulation with LPA. **c.** Transfection of  $\beta$ -arr1/2 DKO MEFs with  $\beta$ -arr1 inhibits Akt activation following LPA stimulation (0-60 mins).

**Fig. S4 U373-PTEN cells express physiological levels of PTEN.** **a.** 50 $\mu$ g of cell lysates from parental U373 cells, U373-PTEN replete cells and various cell lines expressing endogenous PTEN were monitored by Western blot for PTEN expression using an anti-PTEN mAb Santa Cruz PTEN (A2B1): sc-7974. The higher molecular mass observed with U373-PTEN cells is due to the presence of N-terminal His and Xpress tags (PTEN subcloned in pcDNA3HisC). **b.** Western blot of endogenous PTEN found in endogenous  $\beta$ -arr immunoprecipitates from wounded primary rat astrocytes. A1CT is a polyclonal antibody against  $\beta$ -arrs.

**Fig. S5 Summary of PTEN constructs used for migration studies.** Schematic representation of PTEN constructs used. The capacity of PTEN constructs to inhibit migration when injected alone is shown. In addition, the ability of  $\beta$ -arr to rescue migration of the corresponding PTEN mutants is shown.

# Lima-Fernandes Fig. S1

a

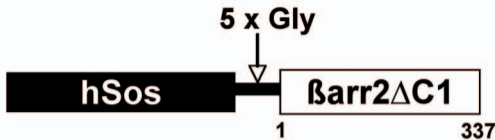

b

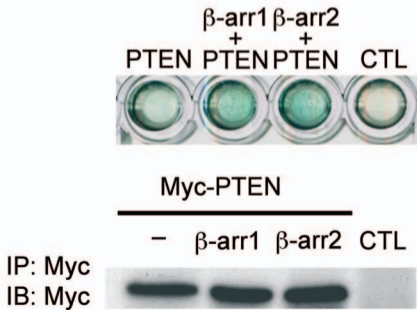

# Lima-Fernandes Fig. S2

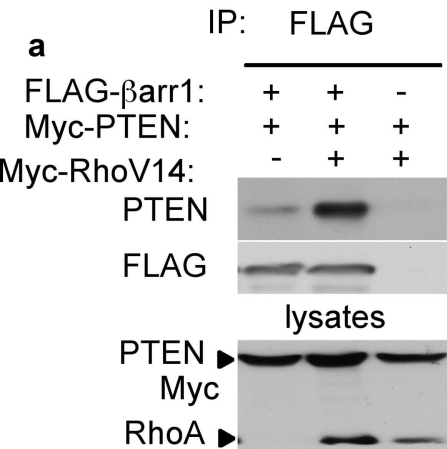

**b**

siRNA: CTL  $\beta$ -arr1/2

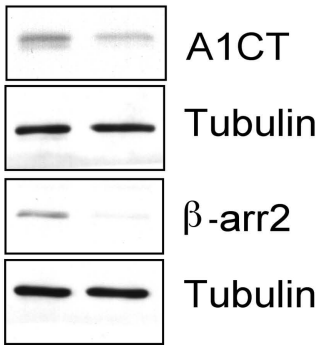

# Lima-Fernandes Fig. S3

**a**

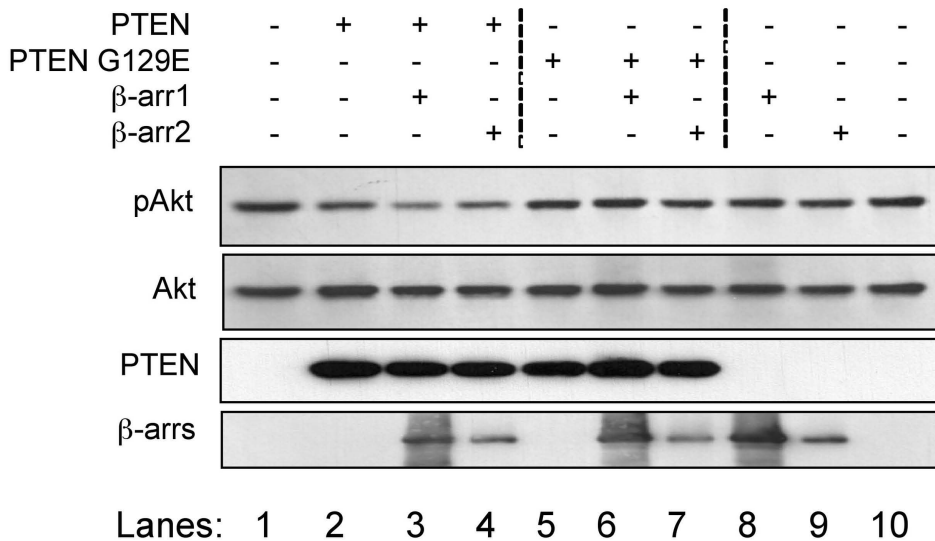

**b**

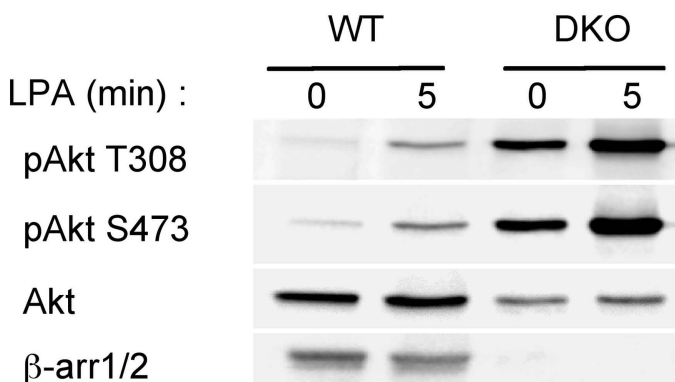

**c**

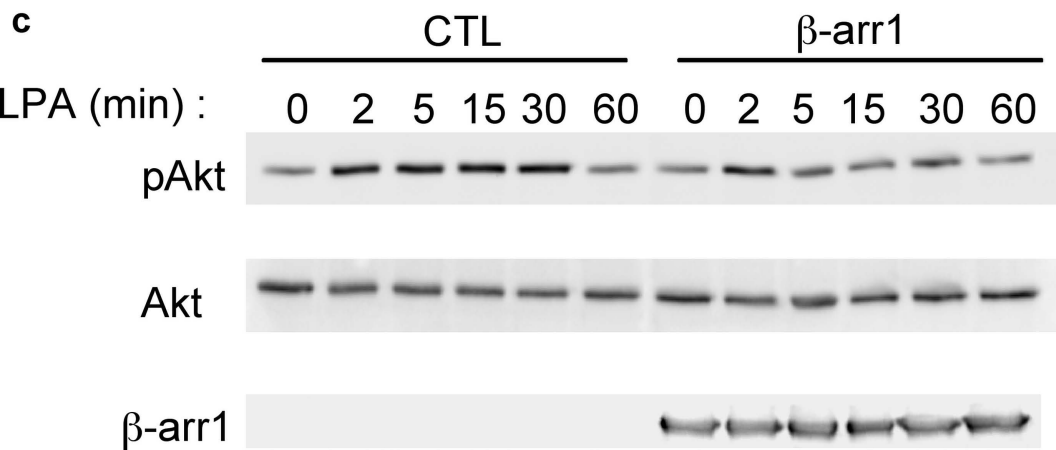

# Lima-Fernandes Fig. S4

**a**

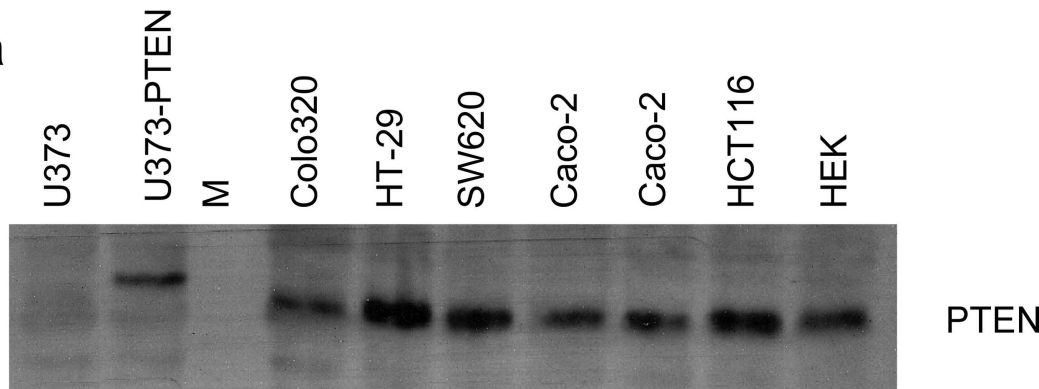

**b**

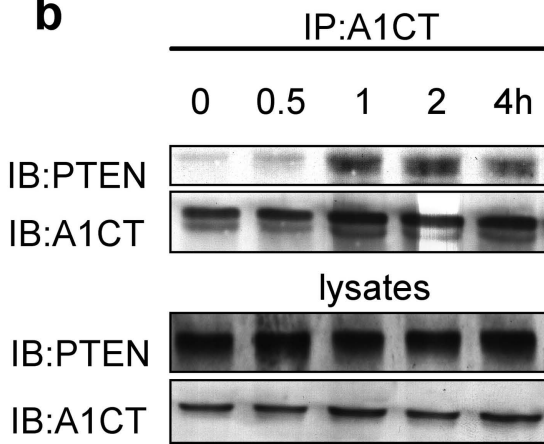

# Lima-Fernandes Fig. S5

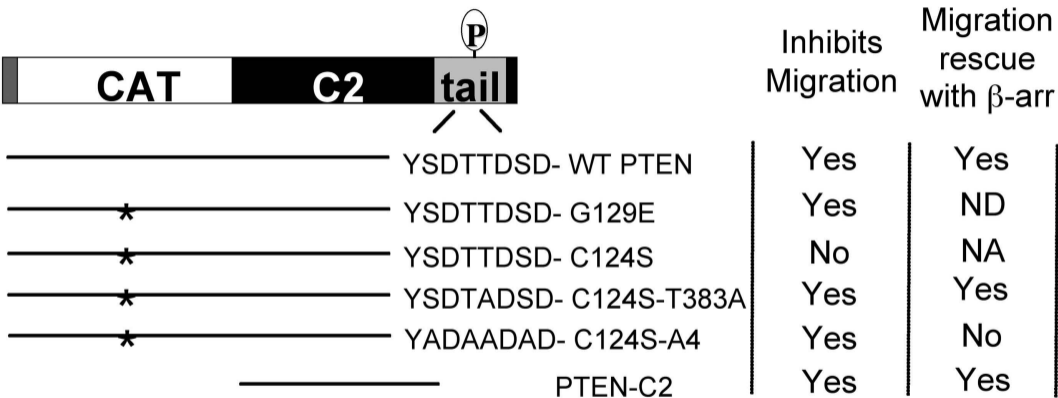

ND: not determined

NA: non-applicable
